# Supplementary material for: Assembly processes and functional diversity of marine protists and their rare biosphere
Source: PubMed Central journal article supplement (PMC10347826; doi:10.1186/s40793-023-00513-w), 2023-07-13
Supplement: 40793_2023_513_MOESM2_ESM.pdf [file 40793_2023_513_MOESM2_ESM.pdf]

## Supplementary Material and Figures

**Title:** Assembly processes and functional diversity of marine protists and their rare biosphere

**Authors and affiliations:** Pierre Ramond<sup>1\*</sup>, Raffaele Siano<sup>2</sup>, Marc Sourisseau<sup>2</sup>, Ramiro Logares<sup>1</sup>

<sup>1</sup>Institute of Marine Sciences (ICM), Department of Marine Biology and Oceanography, CSIC, 08003 Barcelona, Catalunya, Spain

<sup>2</sup>Ifremer-Centre de Brest, DYNECO/Pelagos, Technopôle Brest Iroise, 29280 Plouzané, France

\* **Corresponding author:** email: pierre@icm.csic.es; address: Institute of Marine Sciences (ICM), CSIC, 08003 Barcelona, Catalunya, Spain.

**Competing Interests:** The authors declare no competing interests.

## Supplementary Material 1: Complementary diversity analysis.

OTUs' total read abundance was calculated across our complete dataset, for the three size-fractions (micro, nano and pico-plankton) and across the years covered by our survey (2009-2015). The rarefaction curves as well as diversity extrapolations were then computed with function *iNEXT(datatype="abundance")* from R package *iNEXT* [1]. The results are summarized in the Figure S1A below. We also investigated the relation between the abundance and occurrence of all OTUs across the samples of each size-fraction (Figure S1B). Finally, we studied OTUs distribution across size-fractions with a Venn diagram (Figure S1C).

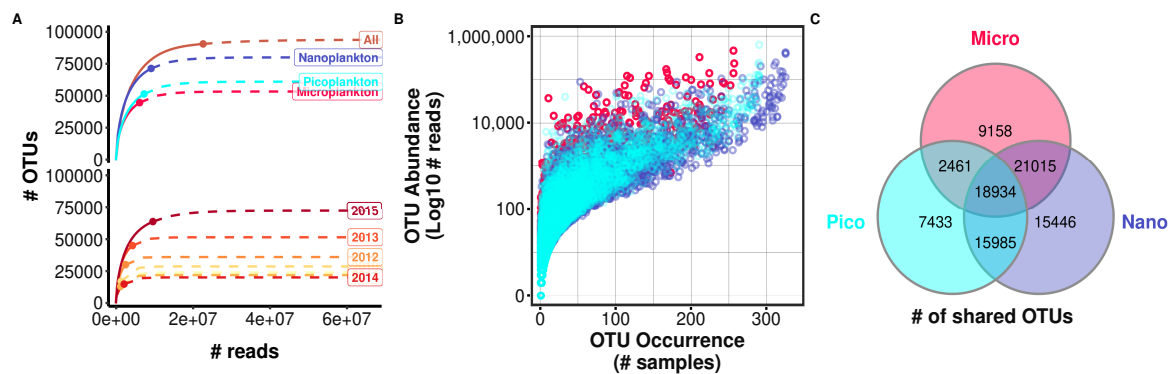

**Figure S1: Complementary diversity analyses.** A) Rarefaction curves for our complete dataset and across size-fractions (top plot), as well as across years (bottom plot). The solid lines correspond to the interpolated rarefaction curves computed by *iNEXT*, the circles correspond to the observed number of reads and OTUs, the dashed lines represent the extrapolated rarefaction curves computed by *iNEXT*. B) Relation between OTUs' abundance and occurrence across samples, each circle corresponds to an OTU. Abundance, estimated by the total number of reads of an OTUs across the samples of each size-fraction, was  $\log_{10}$  transformed for better representation. C) Venn diagram of the presence of OTUs across three size-fractions.

The asymptote of a rarefaction curve is used as a proxy for diversity saturation. Across our complete dataset, the three size-fractions and years, rarefaction curves did not reach diversity saturation (Figure S1A). Diversity extrapolation indicated that diversity in our dataset would amount to ca. 93 500 OTUs, which based on our approach would require  $5.5 \times 10^7$  reads. However, our dataset represents a very good share of this diversity, as we retrieved 90 432 OTUs, i.e. 96% of the estimated diversity. It is likely that the portion of diversity that was missed by our approach corresponds to very rare OTUs with very low abundance. Saturation depended on the number of samples included, we thus decided to work on the largest subsets of dataset possible (per size fractions), and decided against further sub-division of our dataset (across years of spatial regions). Although there existed high variability, we observed that abundant OTUs tended to occur in a larger number of samples, while rarer OTUs occurred in less samples (Figure S1B). It is thus likely that the rare portion of diversity that was missed by our approach would occur in very few samples. The Venn diagram (Figure S1C) indicated that most OTUs were found in several size-fractions. As expected adjacent size-fractions (micro-nano: 21 015 shared OTUs, and nano-pico: 15 446 shared OTUs) shared more OTUs than non-adjacent size-fractions (micro-picoplankton: 2461).

**Supplementary Material 2: Defining rare and abundant OTUs based on Multivariate Cutoff Level Analysis.**

We defined rare and abundant OTUs across size-fraction following the method detailed in references [2,3]. This approach studies the correlation between the original distance matrix of a dataset (all pairwise samples' comparison) and distance matrices computed on subsets of the community from which an increasing number of rare OTUs are removed. In this approach, rare OTUs are those OTUs from which the removal does not affect the correlation between the original and subset distance matrices. The Bray-Curtis distance was used to infer distance matrices from the original and subset datasets [4,5]. The correlation between the original and subset distance matrices was inferred using Spearman's rank correlation and Mantel test, both proxies range between 1 (good correlation) and 0 (poor correlation). Across the rank abundance curves of all size-fractions correlations below 0.9 steeply decreased (Figure S2C), we thus choose this values as the cutoff above which the removed OTUs were considered rare (and the OTUs left as abundant). The subsets correspond to even removals of reads from the total read abundance, i.e. we removed the amount of rare OTUs from which the abundance corresponded to a given percentage of reads.

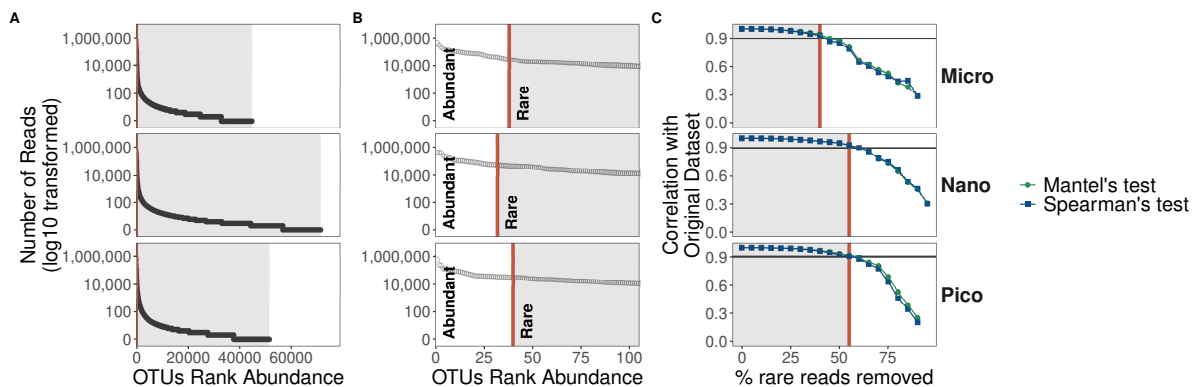

**Figure S2: Rank abundance curves of all size-fractions and multivariate definition of rarity. Rank abundance curves in Figure S2A were computed based on the number of reads of each protistan OTUs across all the samples included in each size-fraction, each OTU is represented by a circle. Figure S2B represent a zoom on the first 100 OTUs of all rank abundance curves. The multivariate definition for rarity presented by Figure S2C relies on the correlation (Mantel or Spearman tests) between the Bray-Curtis distance of the original dataset (one for each size-fraction) and the distance within subsets of this dataset from which an increasing number of rare reads and OTUs are removed. When the correlation reaches values under 0.9, the OTUs left are considered abundant while the OTUs removed are considered rare. This threshold value is represented as a red line across plots and the following gray area represents rare reads or OTUs.**

The multivariate method (Figure S2C) highlighted that there were 38, 32 and 40 abundant OTUs, respectively accounting for 40% (2.46 of  $6.15 \times 10^6$  reads), 55% (5.02 of  $9.13 \times 10^6$  reads) and 55% (4.01 of  $7.3 \times 10^6$  reads) of the total number of reads per size-fraction (micro, nano and picoplankton; Figure S2A & B). Reversely, there were 44 775, 71 348 and 51 528 rare OTUs in the micro, nano and picoplankton (Figure S2A).

### **Supplementary Material 3:** Testing the phylogenetic signal of niche divergence.

This section was performed using functions from R package 'iCAMP', parametrization of the commands followed the recommendations from the supplementary material of the original iCAMP paper [6]. This procedure was performed per size-fraction, using samples for which environmental conditions were available (Temperature, Salinity, NH<sub>4</sub>, NO<sub>x</sub>, PO<sub>4</sub> and SiOH<sub>4</sub>). For this test, we selected only OTUs present in at least 10 different samples per size fractions, considering this threshold as the minimum number of occurrence to give a reliable estimate of environmental niche. The test was performed for 3106, 6410 and 4041 OTUs, across 191, 254 and 238 samples, respectively for micro, nano and pico-plankton.

The procedure of the test is:

- 1) A distance matrix of niche values is computed for the OTUs of each size-fraction and for each environmental variable with the function 'dniche(method = "niche.value")'.
- 2) A phylogenetic distance matrix is computed for the OTUs of each size-fraction with the function 'pdist.big()'.
- 3) Based on each phylogenetic distance matrix, phylogenetic bins (containing phylogenetically similar OTUs) are computed with function 'taxa.binphy.big(ds = 0.2, bin.size.limit = 24)'. This command generated 51, 118 and 70 phylogenetic bins, respectively for the OTUs of micro, nano and pico-plankton.
- 4) For each phylogenetic bin of each size-fraction, the correlation between the phylogenetic distance and the niche distance matrices are compared with function 'ps.bin(cor.method = "pearson")', using Pearson's Correlation coefficient. The output of this command is a coefficient of correlation ( $R^2$ ) between each phylogenetic bin and environmental variable, with the associated p.value.

Overall, there existed a significant correlation between protistan phylogeny and environmental variables within most bins in all size-fractions (40 of 51, 91 of 118, and 51 of 70 phylogenetic bins, within micro, nano, and picoplankton, respectively), thus warranting the use of phylogenetic turnovers for investigating the assembly processes driving the community patterns in our dataset.

**Supplementary Material 4: Testing the fit between environmental variables and assembly processes.**

We studied whether some of the environmental factors measured in our survey could explain the assembly processes of marine protists along subsets of the rank abundance curves we built for each size-fraction. We performed a Permutational Multivariate Analysis of Variance between the phylogenetic turnover ( $\beta$ MNTD) and our set of environmental parameters (PERMANOVA; 'adonis()' function of R package 'vegan' [7]). The variables were not co-varying (Pearson correlation between variables < 0.8), all environmental factors measured were thus included in this analysis. The PERMANOVA's R2 is a proxy of how well the environmental variables fit with the  $\beta$ MNTD.

**A: Protistan Taxonomy of Abundant OTUs and along Rank Abundance Curves**

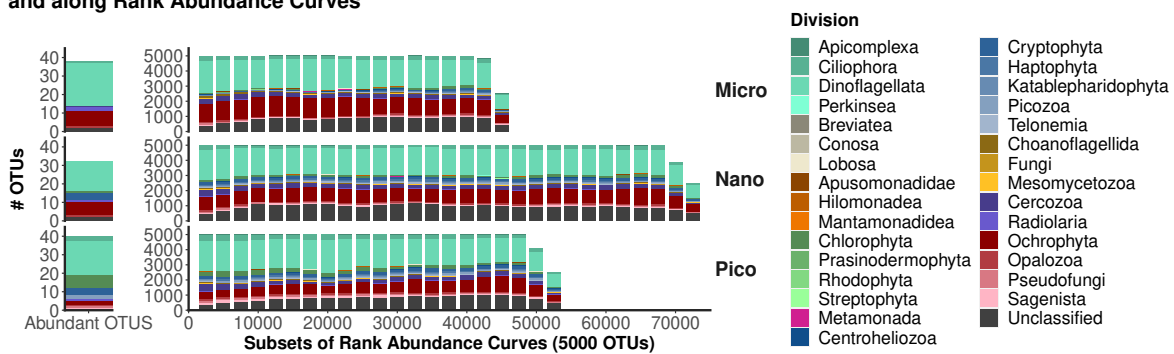

**B: Assembly Processes of Abundant OTUs and along Rank Abundance Curves**

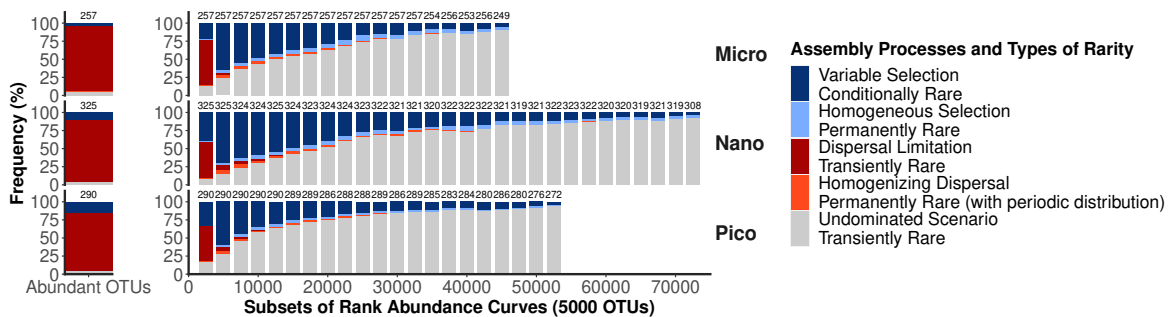

**C: PERMANOVA of Abundant OTUs and along Rank Abundance Curves**

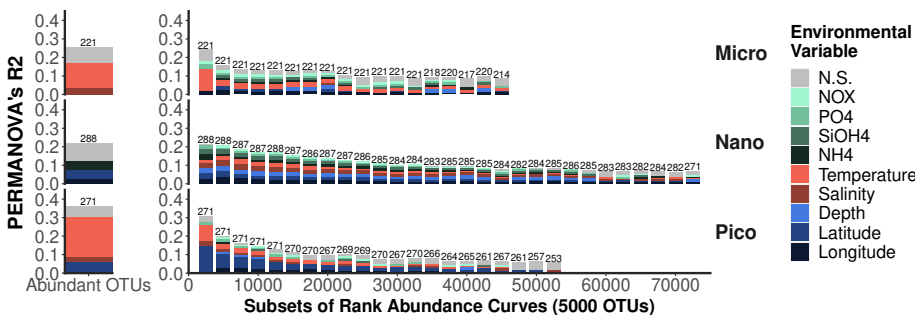

**Figure S3: Protistan taxonomic composition, underlying assembly processes and environmental drivers along rank abundance curves. Abundant OTUs (left side of all graphs) were selected using the multivariate approach of ref. [5]. Subsets of 5000 OTUs were computed with a sliding window along rank abundance curves (X axis on all plots). The last two subsets contain less OTUs because rank abundance curves are not exact multiples of 2500. A) Taxonomy is given at the Division level (as annotated with the PR2 database v4.13.0), taxonomic ranks were sorted by Supergroups. B) Assembly processes were inferred from the distribution of the OTUs in each subset using R package iCAMP ref. [6], the number of samples from which assembly processes were inferred was annotated on top of each barplot (the same procedure was applied in C). Assembly processes were converted into types of rarity following the nomenclature of ref. [3]. C) PERMANOVAs were computed using the  $\beta$ MNTD of each subset (computed during the inference of assembly processes) and the environmental variables measured in our survey. The barplots represent the total  $R^2$  of each PERMANOVA and the color code represent the contribution of each variable to the fit. The overall fit sometimes includes variables for which the individual fit is non-significant (see the gray color code, N.S. stands for not-significant), not to be confused with residual correlation ( $= 1 - \text{overall fit}$ ).**

The assembly processes (Figure S3B) fitted significantly with different environmental variables across size-fractions (Figure S3C). The fit ranged between 0.05 and 0.36 across subsets (value of the  $R^2$ ). The explaining power of environmental variables peaked within the subsets containing the most abundant OTUs and decreased towards the rare-end of rank curves (Figure S3C). It also varied across size-fractions with maxima of 0.25, 0.21, and 0.36 in the micro, nano, and pico-plankton. Micro-plankton appeared to be mostly driven by physical (temperature and salinity) and chemical conditions (nutrient concentrations); Nano-plankton was driven evenly by physico-chemical conditions and distance, both geographic (latitude and longitude) and bathymetric (depth); Pico-plankton was mostly driven by physical conditions (temperature) and geographic distance (Figure S3C). Overall, the set of environmental conditions driving OTUs remained the same along RAC, with few exceptions, e.g. the influence of depth on OTUs in the ranks 15 000 to 20 000 in the micro-plankton (Figure S3C).

The environmental variables measured in our study thus explained only a small fraction of the variation of community patterns across size-fractions, suggesting that un-measured variables (e.g. biotic) or legacy effects (i.e. lags between shifts in community and the environment) could have a large importance on the assembly of marine protists [8]. We hypothesized that the explaining power of environmental variables would peak in subsets where variable selection would dominate the assembly processes and decrease in subsets driven by stochastic processes (Figure S3B). Counterintuitively the explaining power peaked in the most abundant subsets where dispersal limitation dominated (Figure S3B). However, variables involved in dispersal limitation explained most of the fit in these subsets, as

temperature, reflecting thermal boundaries between water masses (fronts or thermoclines) and seasonal contrasts [9], and geographic distance, directly related to dispersal, were the main explaining variables for abundant OTUs (Figures S3B and S3C). The explaining power was thus higher for the communities in these subsets because they were driven both by dispersal and selection. Among intermediate levels of rarity, from the start to the middle of the RAC where variable selection was more pro-eminent (Figure S3B), nutrients had a larger influence for the micro and pico-plankton. Variability in nutrient concentrations is indeed a strong selection factor for phototrophic microbes [10], which constitute a large share of coastal protistan communities [11]. Ammonium ( $\text{NH}_4^+$ ) is a proxy of the remineralization performed by heterotrophic protists within the microbial loop [12,13], but it is also a resource, preferably for small phytoplankton in poor light conditions [14]. The good fit between ammonium concentration, water depth (linked to light availability) and the most abundant protists of the nano-plankton thus stresses the role of this size-class on remineralization and the uptake of ammonium. Finally, pico-sized protists showed a higher fit with geography, which could be explained by a generally narrower geographic distribution compared with larger size-classes [15,16].

### Supplementary Material 5: Phylogenetic signal of rarity.

We tested whether OTUs closely related in terms of phylogeny were also close in abundance and within rank abundance curves. To do this, we studied the correlation between the phylogenetic, abundance and rank-based distances among pairs of OTUs. The computation of complete distance matrices was hampered by the large number of OTUs involved, e.g. 90 432 amounts to a distance matrix of  $90\,432^2 = 8.18$  billions of cells. To circumvent this, we created 999 random subsets of 100 OTUs from which we created and compared the phylogenetic to the abundance and rank-based distance matrices (10 000 cells). The phylogenetic distance matrix was computed in R following [17], using OTUs V4 sequences and functions 'AlignSeqs()' and 'dist.ml()' from R packages 'DECIPHER' [18] and 'phangorn' [19]. Both rank and abundance distance matrices were computed using Euclidean distance [4]. The correlation between distance-matrices was studied using Pearson's correlation coefficient ( $R^2$  and p.value) and a linear regression, the coefficients were collated for the 999 OTUs subsets.

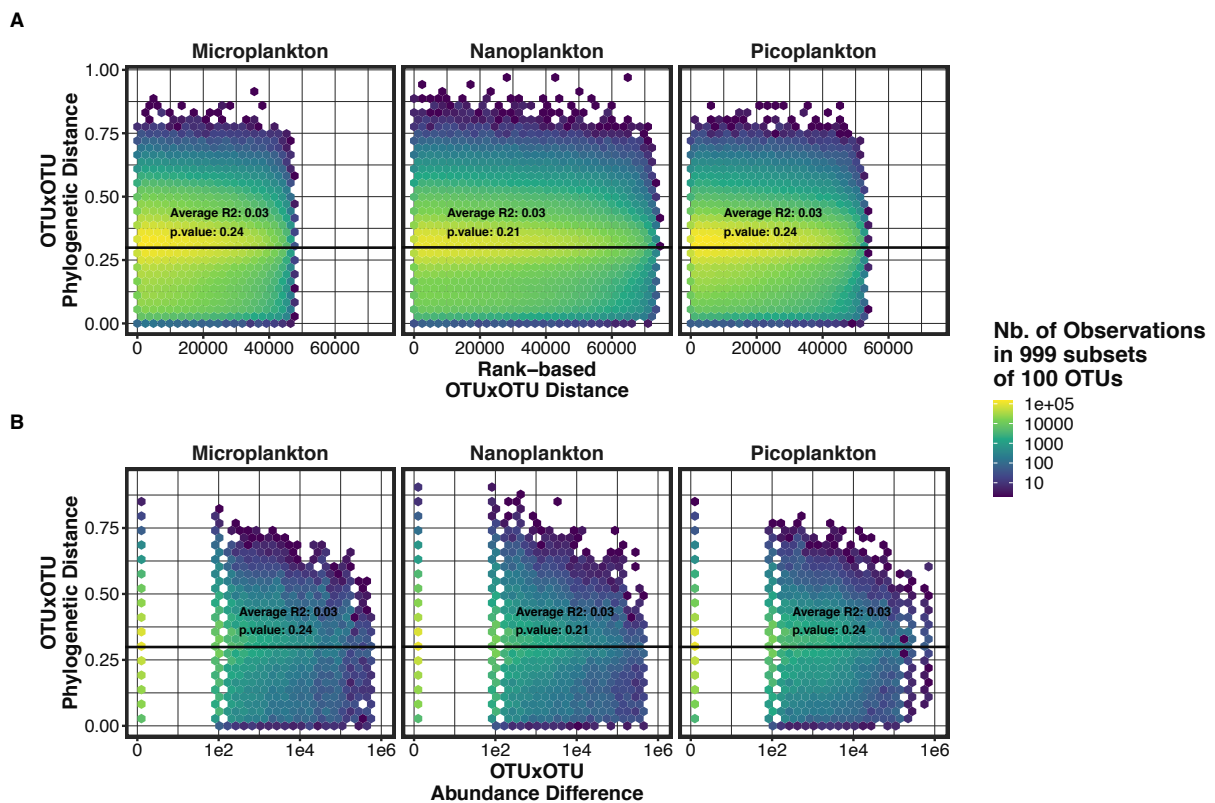

**Figure S4: Testing the phylogenetic signal of rarity among protists. A) Relation between OTUs' phylogenetic distance and distance within the rank abundance curves of micro, nano and pico-plankton. These results originate from 999 subsets of 100 OTUs per size-fraction. Pearson correlation was performed and a linear model was fitted on the results of each subset. The linear model and the correlation on these plots correspond to the averaged coefficients across the subsamples. B) Relation between OTUs' phylogenetic distance and abundance distance (computed as the difference in number of reads in each respective size-fraction). This plot follows the same computational procedures.**

In average, the correlation of phylogeny with rank and phylogeny with abundance were not significant (p.value > 0.05). This was confirmed with the linear models which did not show any



trend (Figure S4). We conclude that there exists no phylogenetic signal for rarity among marine protists, i.e. abundant or rare taxa are not composed of specific phyla.

### Supplementary Material 6: Quantifying functional diversity in the rare protistan biosphere.

To compute metrics of functional diversity we used the subset of functionally annotated OTUs (41 614) and R package 'mFD'. Only non-weighted metrics were computed [20]. Functional richness represents the breadth of ecological strategies in a community (a high number of ecological strategies leads to high functional richness), functional dispersion represents how evenly distributed are the ecological strategies in this breadth (the higher the value the more a community is dominated by a specific ecological strategy) [21]. Functional metrics were computed by aggregating OTUs at the taxonomic reference level, i.e. we studied the presence/absence of 1380 protistan taxonomic references annotated with 13 traits. Not all subsets of rank abundance curves harbored the same amount of annotated taxonomic references, yielding between 315 and 583 taxonomic reference per subset.

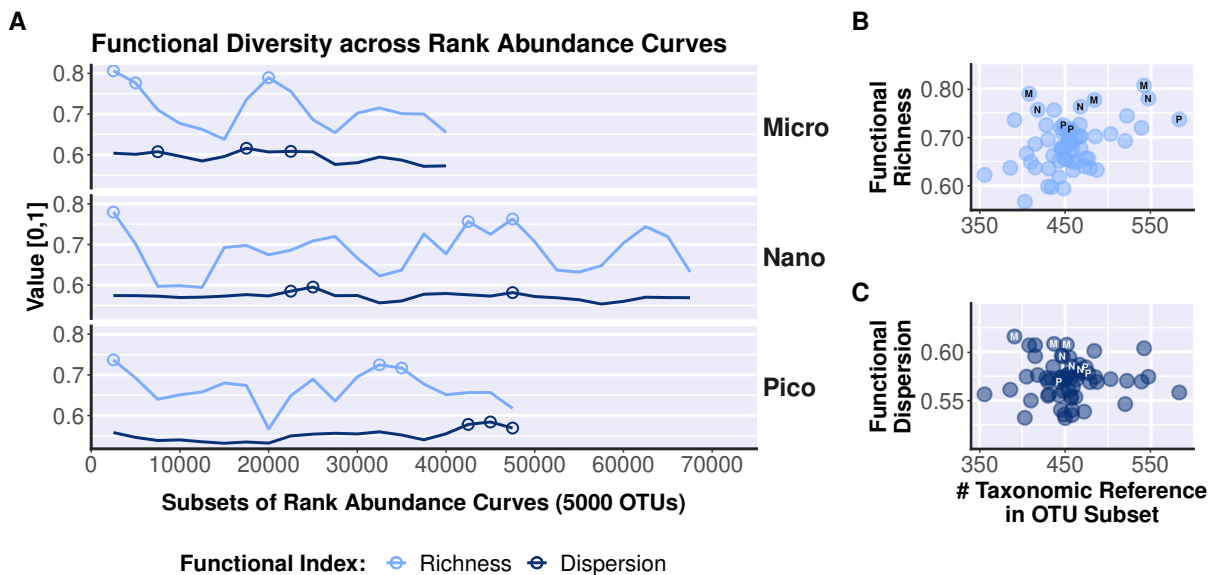

**Figure S5: Functional diversity of marine protists along rank abundance curves (A) and relationship with the number of taxonomic references per subset (B). Functional richness represents the breadth of ecological strategies in a community, functional dispersion represents how evenly distributed are the ecological strategies in this breadth. Both indexes were computed for each subsets of rank abundance curves containing 5000 OTUs, using the taxonomic references annotated with traits (315 and 583 taxonomic references across all subsets) and R package 'mFD'. The 3 highest values of each proxy in each size-fraction were circled and highlighted by a letter corresponding to the size-fraction in the relationship plots ("M" for micro, "N" for nano and "P" for pico-plankton).**

Along rank abundance curves, both functional richness (ranging between 0.57 and 0.81) and dispersion (ranging between 0.53 and 0.62) were high suggesting that ecological strategies were numerous but that subsets were often dominated by few similar strategies (Figure S5A). Both functional richness and dispersion were only weakly correlated to the number of taxonomic references annotated with traits per subsets (Figure S5B), suggesting that the values were not affected by the quality of the trait annotation among subsets. In general, both functional richness, 0.71, 0.68 and 0.67 respectively in micro, nano and pico-plankton, and dispersion, 0.59, 0.57 and 0.55, were lower in smaller size-fractions. High values of functional richness were observed both among subsets of abundant and rare OTUs, in all size-fractions

(Figure S5A). Functional dispersion showed less variability (Figures S5A). Nevertheless, dispersion decreased towards the rarest subsets in the micro-plankton but increased in those of the pico-plankton (Figure S5A), indicating that ecological strategies were more evenly distributed among rare micro-sized protists, and more dominated by few strategies among rare pico-sized protists.

**Supplementary material 7: Analyses with OTUs clustered at 95% of identity.**

Aware that the phylogenetic resolution of our study could affect our results [47,48], we generated a second dataset in which the Swarm2-OTUs were further clustered at 95% of identity using vsearch (--cluster\_size 0.95) [49]. We reproduced: 1) the RACs per-size fraction and subsets of 5000 OTUs (see section *Defining rarity* in the Material and Methods of the original manuscript), 2) the computation of assembly processes and PERMANOVA (see section *Inferring the assembly processes...* in the Material and Methods of the original manuscript), and, 3) the analysis of the link between phylogeny and abundance (see section *Correlation between rarity, traits, and phylogeny* in the Material and Methods of the original manuscript).

**A: Protistan Taxonomy along Rank Abundance Curves**

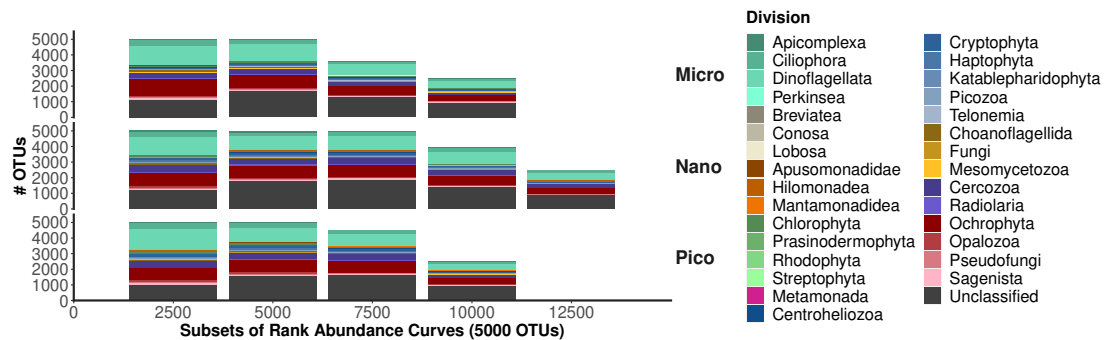

**B: Assembly Processes along Rank Abundance Curves**

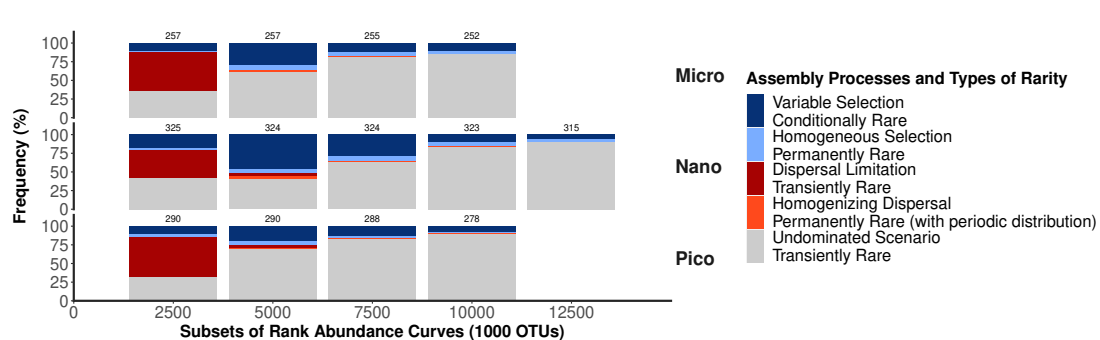

**C: PERMANOVA along Rank Abundance Curves**

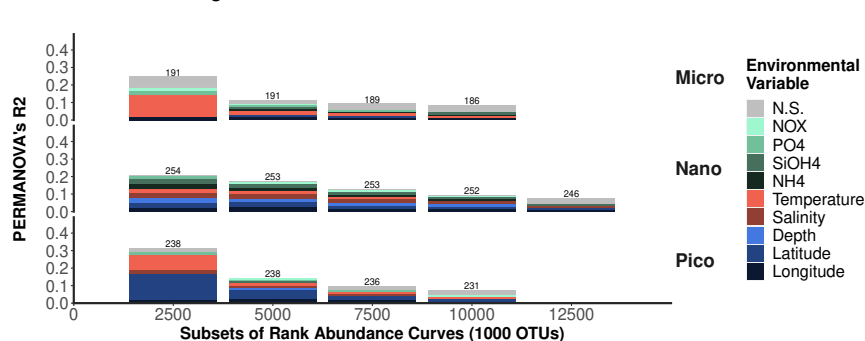

**Figure S6: Protistan taxonomic composition, underlying assembly processes and environmental drivers along the rank abundance curves of our datasets with OTUs clustered at 95% of identity. Abundant OTUs (left side of all graphs) were selected using the multivariate approach of ref. [5]. Subsets of 5000 OTUs were computed with a sliding window along rank abundance curves (X axis on all plots). The last two subsets contain less OTUs because rank abundance curves are not exact multiples of 2500. A) Taxonomy is given at the Division level (as annotated with the PR2 database v4.13.0), taxonomic ranks were sorted by Supergroups. B) Assembly processes were inferred from the distribution of the OTUs in each subset using R package iCAMP ref. [6], the number of samples from which assembly processes were inferred was annotated on top of each barplot (the same procedure was applied in C). Assembly processes were converted into types of rarity following the nomenclature of ref. [3]. C) PERMANOVAs were computed using the BMNTD of each subset (computed during the inference of assembly processes) and the environmental variables measured in our survey. The barplots represent the total  $R^2$  of each PERMANOVA and the color code represent the contribution of each variable to the fit. The overall fit sometimes includes variables for which the individual fit is non-significant (see the gray color code, N.S. stands for not-significant), not to be confused with residual correlation (=  $1 - \text{overall fit}$ ).**

With a lower number of OTUs (8589, 11441 and 9538 OTUs respectively for micro, nano and pico-plankton) and thus less subsets of 5000 OTUs along RACs, we retrieved generally similar results as the ones observed in Figure S3. Briefly, taxonomic diversity remained stable along RACs despite an increase in taxonomically unclassified OTUs towards the rarest-end of RACs, from 22 to 36%, 23 to 33%, and 19 to 36% in the most abundant subset to the rarest, respectively for micro, nano, and pico-plankton (Figure S6A). Assembly processes showed a dominance of *dispersal limitations* in the first subset containing the 5000 more abundant OTUs (53, 37, and 54% of assembly processes, respectively for micro, nano, and picoplankton), a peak in *variable selection* in intermediate levels of rarity (29, 46, and 19%, respectively for micro, nano, and pico-plankton) and a larger influence of stochastic processes (see the proportion of *undominated scenario*, 85, 90, and 89%, respectively for micro, nano, and pico-plankton) in the rare-end of the RACs (Figure S6B). *Homogenizing Selection* persisted in low proportions along the rare subsets of RACs (between 3 and 6%, Figure S6B). The same environmental variables fitted with the phylogenetic turnover of the different size fraction as in the results observed in Figure S3 (see supplementary material 4 for interpretation). We observed the same decrease in explicative power after the first subset of RACs ( $R^2$  from 0.25 to 0.08, 0.20 to 0.08, and 0.31 to 0.07, respectively for the micro, nano, and pico-plankton).

We then studied whether the correlation between phylogeny, rank and abundance changed in the dataset with OTUs clustered at 95% of identity (Figure S7). The average p.value of the correlation between variables across subsets of 100 OTUs were non-significant except for the pico-plankton (average p.value of 0.4). Nevertheless, the average trends (displayed in the linear model) and distribution of the variables showed no co-variance between phylogeny, rank and abundance. We conclude that at this coarser phylogenetic resolution, there was also no phylogenetic signal for rarity among marine protists, i.e. abundant or rare taxa are not composed of specific phyla.

Overall, despite a clear effect on the number of OTUs included in each analysis, the results of supplementary material 7 showed that the phylogenetic resolution (percentage of identity at which OTUs are clustered) had little effect on the patterns we observed in the original

dataset (see manuscript). This, and the large sampling coverage of our study, suggest that the results and hypotheses presented in our manuscript could be extrapolated to other communities sampled at the regional scale.

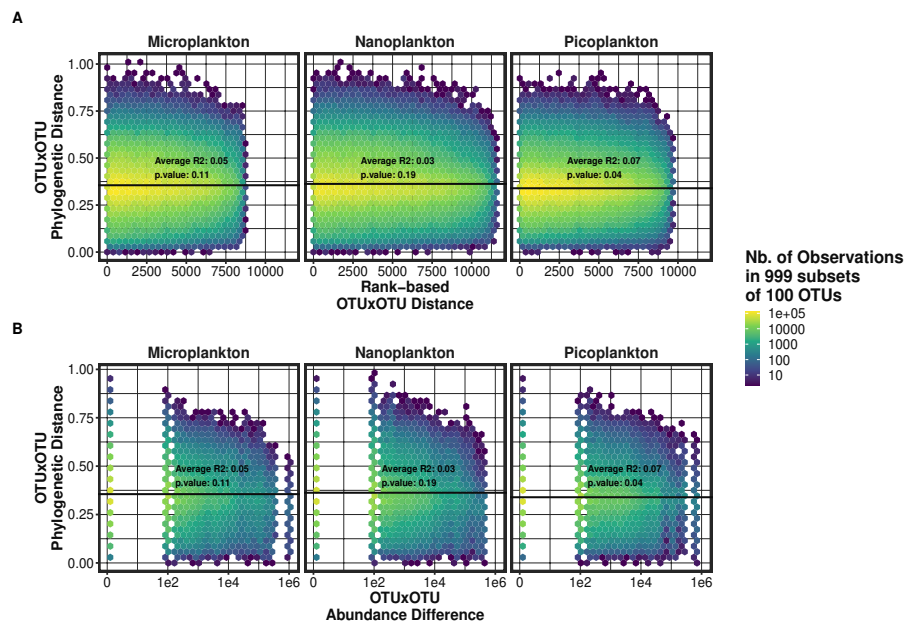

**Figure S7: Testing the phylogenetic signal of rarity among protists based on the dataset of OTUs clustered at 95% of identity. A) Relation between OTUs' phylogenetic distance and distance within the rank abundance curves of micro, nano and pico-plankton. These results originate from 999 subsets of 100 OTUs per size-fraction. Pearson correlation was performed and a linear model was fitted on the results of each subset. The linear model and the correlation on these plots correspond to the averaged coefficients across the subsamples. B) Relation between OTUs' phylogenetic distance and abundance difference (computed as the difference in number of reads in each respective size-fraction). This plot follows the same computational procedures.**

## References

1. Hsieh TC, Ma KH, Chao A. iNEXT: an R package for rarefaction and extrapolation of species diversity (Hill numbers). *Methods Ecol Evol.* 2016;7:1451–6.
2. Sauvadet A-L, Gobet A, Guillou L. Comparative analysis between protist communities from the deep-sea pelagic ecosystem and specific deep hydrothermal habitats. *Environ Microbiol.* 2010;12:2946–64.
3. Jia X, Dini-Andreote F, Falcão Salles J. Community Assembly Processes of the Microbial Rare Biosphere. *Trends Microbiol* [Internet]. Elsevier Ltd; 2018;26:738–47. Available from: <https://doi.org/10.1016/j.tim.2018.02.011>
4. Legendre P, Legendre L. *Numerical Ecology*. Third English Edition. Third Engl. Developments in Environmental Modelling 24, Numerical, editors. Amsterdam (The Netherlands): Elsevier; 2012.
5. Gobet A, Quince C, Ramette A. Multivariate cutoff level analysis (MultiCoLA) of large community data sets. *Nucleic Acids Res.* 2010;38.
6. Ning D, Yuan M, Wu L, Zhang Y, Guo X, Zhou X, et al. A quantitative framework reveals ecological drivers of grassland microbial community assembly in response to warming. *Nat Commun* [Internet]. Springer US; 2020;11. Available from: <http://dx.doi.org/10.1038/s41467-020-18560-z>
7. Oksanen J, Blanchet FG, Friendly M, Kindt R, Legendre P, Mcglinn D, et al. *vegan: Community Ecology Package* [Internet]. 2018. Available from: <https://cran.r-project.org/package=vegan>
8. Ladau J, Eloe-Fadrosh EA. Spatial, Temporal, and Phylogenetic Scales of Microbial Ecology. *Trends Microbiol* [Internet]. The Author(s); 2019;27:662–9. Available from: <https://doi.org/10.1016/j.tim.2019.03.003>
9. Cloern JE. Phytoplankton bloom dynamics in coastal ecosystems: A review with some general lessons from sustained investigation of San Francisco Bay, California. *Rev Geophys.* 1996;34:127.
10. Litchman E, Klausmeier CA, Schofield OM, Falkowski PG. The role of functional traits and trade-offs in structuring phytoplankton communities: Scaling from cellular to ecosystem level. *Ecol Lett.* 2007;10:1170–81.
11. Ramond P, Sourisseau M, Simon N, Romac S, Schmitt S, Rigaut-Jalabert F, et al. Coupling between taxonomic and functional diversity in protistan coastal communities. *Environ Microbiol* [Internet]. John Wiley & Sons, Ltd (10.1111); 2019;21:730–49. Available from: <https://doi.org/10.1111/1462-2920.14537>
12. Dolan JR. Phosphorus and ammonia excretion by planktonic protists. *Mar Geol.* 1997;139:109–22.
13. Legendre L, Rassoulzadegan F. Plankton and nutrient dynamics in marine waters.

Ophelia. 1995;41:153–72.

14. Maguer JF, L'Helguen S, Caradec J, Klein C. Size-dependent uptake of nitrate and ammonium as a function of light in well-mixed temperate coastal waters. *Cont Shelf Res.* 2011;31:1620–31.

15. Burki F, Sandin MM, Jamy M. Diversity and ecology of protists revealed by metabarcoding. *Curr Biol* [Internet]. The Authors; 2021;31:R1267–80. Available from: <https://doi.org/10.1016/j.cub.2021.07.066>

16. Sommeria-Klein G, Watteaux R, Ibarbalz FM, Pierella Karlusich JJ, Iudicone D, Bowler C, et al. Global drivers of eukaryotic plankton biogeography in the sunlit ocean. *Science* (80-). 2021;374:594–9.

17. Callahan BJ, Sankaran K, Fukuyama JA, McMurdie PJ, Holmes SP. Bioconductor workflow for microbiome data analysis: From raw reads to community analyses [version 1; referees: 3 approved]. *F1000Research.* 2016;5:1–49.

18. Wright ES. Using DECIPHER v2.0 to analyze big biological sequence data in R. *R J.* 2016;8:352–9.

19. Schliep KP. phangorn: Phylogenetic analysis in R. *Bioinformatics.* 2011;27:592–3.

20. Bálint M, Bahram M, Eren AM, Faust K, Fuhrman JA, Lindahl B, et al. Millions of reads, thousands of taxa: microbial community structure and associations analyzed via marker genes. *FEMS Microbiol Rev* [Internet]. 2016;6:189–96. Available from: <http://www.ncbi.nlm.nih.gov/pubmed/27358393>

21. Mouillot D, Gaham NAJ, Villéger S, Mason NWH, Bellwood DR. A functional approach reveals community responses to disturbances. *Trends Ecol Evol.* 2013;28:167–77.



**Supplementary Table 1: Information on the number of OTUs, number of taxonomic references and number of OTUs successfully annotated with traits across Eukaryotic Divisions.**

| Taxonomy  |                  | OTUs and Taxonomic references |                                       |                                               | Trait annotation                     |                                |
|-----------|------------------|-------------------------------|---------------------------------------|-----------------------------------------------|--------------------------------------|--------------------------------|
| Kingdom   | Division         | Number of OTUs                | Number of unique taxonomic references | Average number of taxonomic reference per OTU | Number of OTUs with trait annotation | % of OTUs annotated with trait |
| Eukaryota | Alveolata        | 31170                         | 640                                   | 48,70                                         | 15980                                | 51,26724415                    |
| Eukaryota | Apusomonadida    | 83                            | 21                                    | 3,95                                          | 83                                   | 100                            |
| Eukaryota | Breviatida       | 5                             | 3                                     | 1,67                                          | 5                                    | 100                            |
| Eukaryota | Centrohelida     | 136                           | 28                                    | 4,86                                          | 90                                   | 66,17647059                    |
| Eukaryota | Conosa           | 5                             | 5                                     | 1,00                                          | 5                                    | 100                            |
| Eukaryota | Cryptophyta      | 2656                          | 19                                    | 139,79                                        | 2651                                 | 99,81174699                    |
| Eukaryota | Haptophyta       | 1279                          | 46                                    | 27,80                                         | 742                                  | 58,01407349                    |
| Eukaryota | Holomycota       | 706                           | 105                                   | 6,72                                          | 395                                  | 55,9490085                     |
| Eukaryota | Holozoa          | 1342                          | 37                                    | 36,27                                         | 997                                  | 74,29210134                    |
| Eukaryota | Katablepharidida | 521                           | 13                                    | 40,08                                         | 481                                  | 92,32245681                    |
| Eukaryota | Lobosa           | 47                            | 14                                    | 3,36                                          | 47                                   | 100                            |
| Eukaryota | Mantamonadida    | 1                             | 1                                     | 1,00                                          | 1                                    | 100                            |
| Eukaryota | Metamonada       | 7                             | 3                                     | 2,33                                          | 7                                    | 100                            |
| Eukaryota | Microhelida      | 1                             | 1                                     | 1,00                                          | 1                                    | 100                            |
| Eukaryota | Picomonadida     | 1278                          | 2                                     | 639,00                                        | 1278                                 | 100                            |
| Eukaryota | Planomonadida    | 21                            | 10                                    | 2,10                                          | 21                                   | 100                            |
| Eukaryota | Rhizaria         | 5556                          | 211                                   | 26,33                                         | 1923                                 | 34,6112311                     |
| Eukaryota | Rigifilida       | 3                             | 1                                     | 3,00                                          | 3                                    | 100                            |
| Eukaryota | Stramenopiles    | 22839                         | 386                                   | 59,17                                         | 12666                                | 55,4577696                     |
| Eukaryota | Telonemida       | 843                           | 5                                     | 168,60                                        | 843                                  | 100                            |
| Eukaryota | Viridiplantae    | 3520                          | 99                                    | 35,56                                         | 3395                                 | 96,44886364                    |
| Eukaryota | Unclassified     | 18413                         | 30                                    | 613,77                                        | 0                                    | 0                              |
| Eukaryota | Total            | 90432                         | 1680                                  | 53,83                                         | 41614                                | 46,01689667                    |

Supplementary Table 2: Total abundance (# of reads), occurrence (# of samples), rank, and taxonomy of abundant OTUs across the three size fractions (micro, nano, and picoplankton).

| otu ID | SF    | Nb of Reads | Nb of Occurrence | Rank | Kingdom   | Supergroup     | Division                | Class                     | Order                      | Family                                   | Genus                           | Species                             |
|--------|-------|-------------|------------------|------|-----------|----------------|-------------------------|---------------------------|----------------------------|------------------------------------------|---------------------------------|-------------------------------------|
| 11     | Micro | 461349      | 256              | 1    | Eukaryota | Alveolata      | Dinoflagellata          | Dinophyceae               | Gymnodinales               | Gymnodiniaceae                           | Gyrodinium                      | Gyrodinium_spirale                  |
| 19     | Micro | 326629      | 211              | 2    | Eukaryota | Alveolata      | Dinoflagellata          | Dinophyceae               | Gonyaulacales              | Ceraticeae                               | Tripos                          | Tripos_fusus                        |
| 5      | Micro | 234638      | 257              | 3    | Eukaryota | Alveolata      | Dinoflagellata          | Dinophyceae               | Gonyaulacales              | Kareniaceae                              | Karenia                         | Karenia_brevis                      |
| 28     | Micro | 172879      | 167              | 4    | Eukaryota | Alveolata      | Unclassified            | Unclassified              | Unclassified               | Unclassified                             | Unclassified                    | Unclassified                        |
| 39     | Micro | 145038      | 168              | 5    | Eukaryota | Alveolata      | Dinoflagellata          | Dinophyceae               | Unclassified               | Unclassified                             | Unclassified                    | Unclassified                        |
| 20     | Micro | 140373      | 224              | 6    | Eukaryota | Stramenopiles  | Ochrophyta              | Bacillariophyta           | Bacillariophyta_X          | Radial-centric-basal-Coscinodiscophyceae | Guinardia                       | Guinardia_delicatula                |
| 4      | Micro | 140000      | 256              | 7    | Eukaryota | Alveolata      | Dinoflagellata          | Dinophyceae               | Peridinales                | Heterocapsaceae                          | Heterocapsa                     | Unclassified                        |
| 44     | Micro | 121482      | 115              | 8    | Eukaryota | Alveolata      | Dinoflagellata          | Dinophyceae               | Gymnodinales               | Warnowiaceae                             | Warnowia                        | Warnowia_sp.                        |
| 46     | Micro | 121252      | 144              | 9    | Eukaryota | Alveolata      | Dinoflagellata          | Dinophyceae               | Gymnodinales               | Gymnodiniaceae                           | Unclassified                    | Unclassified                        |
| 26     | Micro | 112429      | 193              | 10   | Eukaryota | Rhizaria       | Radiolaria              | Acantharea                | Chaunacanthida             | Chaunacanthida_X                         | Acanthometron                   | Acanthometron_sp.                   |
| 62     | Micro | 109559      | 119              | 11   | Eukaryota | Alveolata      | Dinoflagellata          | Dinophyceae               | Gonyaulacales              | Goniomomataceae                          | Alexandrium                     | Unclassified                        |
| 42     | Micro | 105768      | 170              | 12   | Eukaryota | Alveolata      | Dinoflagellata          | Dinophyceae               | Gymnodinales               | Gymnodiniaceae                           | Gyrodinium                      | Gyrodinium_heterogrammmum           |
| 31     | Micro | 98613       | 200              | 13   | Eukaryota | Alveolata      | Dinoflagellata          | Dinophyceae               | Gymnodinales               | Gymnodiniaceae                           | Lepidodinium                    | Lepidodinium_chloroxum              |
| 33     | Micro | 94753       | 172              | 14   | Eukaryota | Stramenopiles  | Ochrophyta              | Bacillariophyta           | Bacillariophyta_X          | Radial-centric-basal-Coscinodiscophyceae | Leptocylindrus                  | Leptocylindrus_convexus             |
| 38     | Micro | 86742       | 242              | 15   | Eukaryota | Alveolata      | Dinoflagellata          | Dinophyceae               | Syndiniales                | Dino-Group-I                             | Dino-Group-I-Clade-1            | Dino-Group-I-Clade-1_X_sp.          |
| 78     | Micro | 83312       | 140              | 16   | Eukaryota | Alveolata      | Dinoflagellata          | Noctilucophyceae          | Noctilucales               | Noctilucaeae                             | Noctiluca                       | Noctiluca_scintillans               |
| 7      | Micro | 81514       | 244              | 17   | Eukaryota | Stramenopiles  | Ochrophyta              | Bacillariophyta           | Bacillariophyta_X          | Polar-centric-Mediophyceae               | Chaetoceros                     | Chaetoceros_tenuissimus             |
| 18     | Micro | 80566       | 225              | 18   | Eukaryota | Alveolata      | Dinoflagellata          | Dinophyceae               | Gymnodinales               | Unclassified                             | Unclassified                    | Unclassified                        |
| 8      | Micro | 77226       | 213              | 19   | Eukaryota | Stramenopiles  | Ochrophyta              | Bacillariophyta           | Bacillariophyta_X          | Polar-centric-Mediophyceae               | Minidiscus                      | Minidiscus_comicus                  |
| 1      | Micro | 75629       | 180              | 20   | Eukaryota | Alveolata      | Dinoflagellata          | Dinophyceae               | Gonyaulacales              | Goniomomataceae                          | Alexandrium                     | Unclassified                        |
| 54     | Micro | 73403       | 112              | 21   | Eukaryota | Rhizaria       | Cercozoa                | Filosa-Thecofilosea       | Ebrida                     | Ebridae                                  | Ebria                           | Ebria_tripartita                    |
| 23     | Micro | 73388       | 252              | 22   | Eukaryota | Stramenopiles  | Ochrophyta              | Bacillariophyta           | Bacillariophyta_X          | Polar-centric-Mediophyceae               | Minidiscus                      | Minidiscus_variabilis               |
| 40     | Micro | 69602       | 58               | 23   | Eukaryota | Alveolata      | Dinoflagellata          | Dinophyceae               | Gymnodinales               | Warnowiaceae                             | Warnowia                        | Warnowia_sp.                        |
| 60     | Micro | 65914       | 138              | 24   | Eukaryota | Stramenopiles  | Opalozoa                | MAST-12                   | Unclassified               | Unclassified                             | Unclassified                    | Unclassified                        |
| 72     | Micro | 58532       | 64               | 25   | Eukaryota | Alveolata      | Dinoflagellata          | Dinophyceae               | Unclassified               | Unclassified                             | Unclassified                    | Unclassified                        |
| 53     | Micro | 51459       | 105              | 26   | Eukaryota | Alveolata      | Dinoflagellata          | Dinophyceae               | Prorocentrales             | Prorocentrales                           | Prorocentrum                    | Unclassified                        |
| 80     | Micro | 49969       | 104              | 27   | Eukaryota | Stramenopiles  | Ochrophyta              | Bacillariophyta           | Bacillariophyta_X          | Polar-centric-Mediophyceae               | Unclassified                    | Unclassified                        |
| 123    | Micro | 44354       | 112              | 28   | Eukaryota | Alveolata      | Dinoflagellata          | Dinophyceae               | Gymnodinales               | Ceratoperidiniaceae                      | Ceratoperidinium                | Ceratoperidinium_falcatum           |
| 68     | Micro | 44251       | 74               | 29   | Eukaryota | Alveolata      | Dinoflagellata          | Dinophyceae               | Gymnodinales               | Unclassified                             | Unclassified                    | Unclassified                        |
| 116    | Micro | 42734       | 117              | 30   | Eukaryota | Alveolata      | Dinoflagellata          | Dinophyceae               | Gymnodinales               | Chytriodiniaceae                         | Unclassified                    | Unclassified                        |
| 41     | Micro | 40509       | 105              | 31   | Eukaryota | Stramenopiles  | Ochrophyta              | Bacillariophyta           | Bacillariophyta_X          | Polar-centric-Mediophyceae               | Unclassified                    | Unclassified                        |
| 51     | Micro | 40280       | 240              | 32   | Eukaryota | Alveolata      | Dinoflagellata          | Dinophyceae               | Suessiales                 | Suessiaceae                              | Biechleria                      | Biechleria_sp.                      |
| 169    | Micro | 37300       | 11               | 33   | Eukaryota | Rhizaria       | Radiolaria              | Polycystinea              | Colodaria                  | Sphaerozoidea                            | Collozoum                       | Collozoum_inerme                    |
| 25     | Micro | 34610       | 229              | 34   | Eukaryota | Alveolata      | Dinoflagellata          | Dinophyceae               | Gymnodinales               | Gymnodiniaceae                           | Gyrodinium                      | Gyrodinium_helveticum               |
| 53     | Micro | 31532       | 206              | 35   | Eukaryota | Stramenopiles  | Stramenopiles_X-Group-7 | Stramenopiles_X-Group-7_X | Stramenopiles_X-Group-7_XX | Stramenopiles_X-Group-7_XXX              | Stramenopiles_X-Group-7_XXX_sp. | Stramenopiles_X-Group-7_XXX_sp.     |
| 29     | Micro | 29845       | 88               | 36   | Eukaryota | Alveolata      | Dinoflagellata          | Dinophyceae               | Gonyaulacales              | Gonyaulacaceae                           | Gonyaulax                       | Gonyaulax_spinifera                 |
| 95     | Micro | 27186       | 126              | 37   | Eukaryota | Stramenopiles  | Ochrophyta              | Bacillariophyta           | Bacillariophyta_X          | Raphid-pennate                           | Pseudo-nitzschia                | Unclassified                        |
| 64     | Micro | 26609       | 211              | 38   | Eukaryota | Alveolata      | Ciliophora              | Spirotrichea              | Choreotrichida             | Spirotrichidae_I                         | Pelagostrobilidium              | Pelagostrobilidium_neptuni          |
| 5      | Nano  | 420419      | 325              | 1    | Eukaryota | Alveolata      | Dinoflagellata          | Dinophyceae               | Gymnodinales               | Kareniaceae                              | Karenia                         | Karenia_brevis                      |
| 11     | Nano  | 407695      | 325              | 2    | Eukaryota | Alveolata      | Dinoflagellata          | Dinophyceae               | Gymnodinales               | Gymnodiniaceae                           | Gyrodinium                      | Gyrodinium_spirale                  |
| 4      | Nano  | 388757      | 325              | 3    | Eukaryota | Alveolata      | Dinoflagellata          | Dinophyceae               | Peridinales                | Heterocapsaceae                          | Heterocapsa                     | Unclassified                        |
| 18     | Nano  | 247007      | 312              | 4    | Eukaryota | Alveolata      | Dinoflagellata          | Dinophyceae               | Gymnodinales               | Unclassified                             | Unclassified                    | Unclassified                        |
| 10     | Nano  | 211664      | 310              | 5    | Eukaryota | Alveolata      | Dinoflagellata          | Dinophyceae               | Unclassified               | Unclassified                             | Unclassified                    | Unclassified                        |
| 8      | Nano  | 202808      | 292              | 6    | Eukaryota | Stramenopiles  | Ochrophyta              | Bacillariophyta           | Bacillariophyta_X          | Polar-centric-Mediophyceae               | Minidiscus                      | Minidiscus_comicus                  |
| 25     | Nano  | 155701      | 318              | 7    | Eukaryota | Alveolata      | Dinoflagellata          | Dinophyceae               | Gymnodinales               | Gymnodiniaceae                           | Gyrodinium                      | Gyrodinium_helveticum               |
| 23     | Nano  | 150802      | 321              | 8    | Eukaryota | Stramenopiles  | Ochrophyta              | Bacillariophyta           | Bacillariophyta_X          | Polar-centric-Mediophyceae               | Minidiscus                      | Minidiscus_variabilis               |
| 22     | Nano  | 119674      | 321              | 9    | Eukaryota | Hacrobia       | Cryptophyta             | Cryptophyceae             | Cryptomonadales            | Cryptomonadales_X                        | Plagioselmis                    | Plagioselmis_prolonga               |
| 32     | Nano  | 113909      | 325              | 10   | Eukaryota | Alveolata      | Dinoflagellata          | Dinophyceae               | Gymnodinales               | Gymnodiniaceae                           | Gymnodinium                     | Gymnodinium_sp.                     |
| 16     | Nano  | 107617      | 268              | 11   | Eukaryota | Hacrobia       | Cryptophyta             | Cryptophyceae             | Cryptomonadales            | Cryptomonadales_X                        | Teleaulax                       | Teleaulax_acuta                     |
| 2      | Nano  | 107485      | 306              | 12   | Eukaryota | Archaeplastida | Chlorophyta             | Mamiellophyceae           | Mamielliales               | Bathycocaceae                            | Ostreococcus                    | Ostreococcus_lucimarinus            |
| 30     | Nano  | 105866      | 319              | 13   | Eukaryota | Hacrobia       | Cryptophyta             | Cryptophyceae             | Cryptomonadales            | Cryptomonadales_X                        | Teleaulax                       | Teleaulax_gracilis                  |
| 28     | Nano  | 105161      | 240              | 14   | Eukaryota | Alveolata      | Unclassified            | Unclassified              | Unclassified               | Unclassified                             | Unclassified                    | Unclassified                        |
| 20     | Nano  | 100827      | 296              | 15   | Eukaryota | Stramenopiles  | Ochrophyta              | Bacillariophyta           | Bacillariophyta_X          | Radial-centric-basal-Coscinodiscophyceae | Guinardia                       | Guinardia_delicatula                |
| 38     | Nano  | 94441       | 292              | 16   | Eukaryota | Alveolata      | Dinoflagellata          | Dinophyceae               | Syndiniales                | Dino-Group-I                             | Dino-Group-I-Clade-1            | Dino-Group-I-Clade-1_X_sp.          |
| 40     | Nano  | 88662       | 53               | 17   | Eukaryota | Alveolata      | Dinoflagellata          | Dinophyceae               | Gymnodinales               | Warnowiaceae                             | Warnowia                        | Warnowia_sp.                        |
| 33     | Nano  | 88556       | 181              | 18   | Eukaryota | Stramenopiles  | Ochrophyta              | Bacillariophyta           | Bacillariophyta_X          | Radial-centric-basal-Coscinodiscophyceae | Leptocylindrus                  | Leptocylindrus_convexus             |
| 31     | Nano  | 84194       | 284              | 19   | Eukaryota | Alveolata      | Dinoflagellata          | Dinophyceae               | Gymnodinales               | Gymnodiniaceae                           | Lepidodinium                    | Lepidodinium_chlorophorum           |
| 7      | Nano  | 84137       | 311              | 20   | Eukaryota | Stramenopiles  | Ochrophyta              | Bacillariophyta           | Bacillariophyta_X          | Polar-centric-Mediophyceae               | Chaetoceros                     | Chaetoceros_tenuissimus             |
| 48     | Nano  | 77518       | 322              | 21   | Eukaryota | Alveolata      | Dinoflagellata          | Dinophyceae               | Unclassified               | Unclassified                             | Unclassified                    | Unclassified                        |
| 41     | Nano  | 75200       | 284              | 22   | Eukaryota | Stramenopiles  | Ochrophyta              | Bacillariophyta           | Bacillariophyta_X          | Polar-centric-Mediophyceae               | Unclassified                    | Unclassified                        |
| 56     | Nano  | 73226       | 305              | 23   | Eukaryota | Alveolata      | Dinoflagellata          | Dinophyceae               | Peridinales                | Heterocapsaceae                          | Heterocapsa                     | Heterocapsa_nei/rotundata           |
| 93     | Nano  | 66758       | 319              | 24   | Eukaryota | Alveolata      | Dinoflagellata          | Dinophyceae               | Gymnodinales               | Gymnodiniaceae                           | Gyrodinium                      | Gyrodinium_dominans                 |
| 74     | Nano  | 62704       | 221              | 25   | Eukaryota | Unclassified   | Unclassified            | Unclassified              | Unclassified               | Unclassified                             | Unclassified                    | Unclassified                        |
| 60     | Nano  | 61721       | 144              | 26   | Eukaryota | Stramenopiles  | Opalozoa                | MAST-12                   | Unclassified               | Unclassified                             | Unclassified                    | Unclassified                        |
| 39     | Nano  | 58289       | 202              | 27   | Eukaryota | Alveolata      | Dinoflagellata          | Dinophyceae               | Unclassified               | Unclassified                             | Unclassified                    | Unclassified                        |
| 26     | Nano  | 57541       | 201              | 28   | Eukaryota | Rhizaria       | Radiolaria              | Acantharea                | Chaunacanthida             | Chaunacanthida_X                         | Acanthometron                   | Acanthometron_sp.                   |
| 59     | Nano  | 56386       | 302              | 29   | Eukaryota | Hacrobia       | Cryptophyta             | Cryptophyceae             | Cryptomonadales            | Cryptomonadales_X                        | Unclassified                    | Unclassified                        |
| 45     | Nano  | 56093       | 273              | 30   | Eukaryota | Stramenopiles  | Ochrophyta              | Bacillariophyta           | Bacillariophyta_X          | Radial-centric-basal-Coscinodiscophyceae | Leptocylindrus                  | Leptocylindrus_sp.                  |
| 42     | Nano  | 54745       | 225              | 31   | Eukaryota | Alveolata      | Dinoflagellata          | Dinophyceae               | Gymnodinales               | Gymnodiniaceae                           | Gyrodinium                      | Gyrodinium_heterogrammmum           |
| 78     | Nano  | 51471       | 160              | 32   | Eukaryota | Alveolata      | Dinoflagellata          | Noctilucophyceae          | Noctilucales               | Noctilucaeae                             | Noctiluca                       | Noctiluca_scintillans               |
| 2      | Pico  | 628227      | 290              | 1    | Eukaryota | Archaeplastida | Chlorophyta             | Mamiellophyceae           | Mamielliales               | Bathycocaceae                            | Ostreococcus                    | Ostreococcus_lucimarinus            |
| 15     | Pico  | 244477      | 290              | 2    | Eukaryota | Archaeplastida | Chlorophyta             | Mamiellophyceae           | Mamielliales               | Mamiellaceae                             | Micromonas                      | Micromonas_aximinada_A2             |
| 21     | Pico  | 222671      | 289              | 3    | Eukaryota | Archaeplastida | Chlorophyta             | Mamiellophyceae           | Mamielliales               | Bathycocaceae                            | Bathycoccus                     | Bathycoccus_prasinus                |
| 4      | Pico  | 128778      | 289              | 4    | Eukaryota | Alveolata      | Dinoflagellata          | Dinophyceae               | Peridinales                | Heterocapsaceae                          | Heterocapsa                     | Unclassified                        |
| 14     | Pico  | 128185      | 286              | 5    | Eukaryota | Archaeplastida | Chlorophyta             | Mamiellophyceae           | Mamielliales               | Mamiellaceae                             | Micromonas                      | Micromonas_bravo_B2                 |
| 35     | Pico  | 127188      | 290              | 6    | Eukaryota | Archaeplastida | Chlorophyta             | Mamiellophyceae           | Mamielliales               | Mamiellaceae                             | Micromonas                      | Unclassified                        |
| 5      | Pico  | 117091      | 290              | 7    | Eukaryota | Alveolata      | Dinoflagellata          | Dinophyceae               | Gymnodinales               | Kareniaceae                              | Karenia                         | Karenia_brevis                      |
| 22     | Pico  | 112722      | 289              | 8    | Eukaryota | Hacrobia       | Cryptophyta             | Cryptophyceae             | Cryptomonadales            | Cryptomonadales_X                        | Plagioselmis                    | Plagioselmis_prolonga               |
| 10     | Pico  | 110219      | 277              | 9    | Eukaryota | Alveolata      | Dinoflagellata          | Dinophyceae               | Unclassified               | Unclassified                             | Unclassified                    | Unclassified                        |
| 25     | Pico  | 92313       | 269              | 10   | Eukaryota | Alveolata      | Dinoflagellata          | Dinophyceae               | Gymnodinales               | Gymnodiniaceae                           | Gyrodinium                      | Gyrodinium_helveticum               |
| 30     | Pico  | 87273       | 288              | 11   | Eukaryota | Hacrobia       | Cryptophyta             | Cryptophyceae             | Cryptomonadales            | Cryptomonadales_X                        | Teleaulax                       | Teleaulax_gracilis                  |
| 43     | Pico  | 82190       | 281              | 12   | Eukaryota | Hacrobia       | Picozoa                 | Picozoa_X                 | Picozoa_XX                 | Picozoa_XXX                              | Picozoa_XXX                     | Picozoa_XXX_sp.                     |
| 11     | Pico  | 79986       | 289              | 13   | Eukaryota | Alveolata      | Dinoflagellata          | Dinophyceae               | Gymnodinales               | Gymnodiniaceae                           | Gyrodinium                      | Gyrodinium_spirale                  |
| 38     | Pico  | 72639       | 266              | 14   | Eukaryota | Alveolata      | Dinoflagellata          | Dinophyceae               | Syndiniales                | Dino-Group-I                             | Dino-Group-I-Clade-1            | Dino-Group-I-Clade-1_X_sp.          |
| 32     | Pico  | 64853       | 282              | 15   | Eukaryota | Alveolata      | Dinoflagellata          | Dinophyceae               | Gymnodinales               | Gymnodiniaceae                           | Gymnodinium                     | Gymnodinium_sp.                     |
| 49     | Pico  | 62024       | 250              | 16   | Eukaryota | Alveolata      | Dinoflagellata          | Dinophyceae               | Syndiniales                | Dino-Group-I                             | Dino-Group-I-Clade-1            | Dino-Group-I-Clade-1_X_sp.          |
| 26     | Pico  | 55277       | 176              | 17   | Eukaryota | Rhizaria       | Radiolaria              | Acantharea                | Chaunacanthida             | Chaunacanthida_X                         | Acanthometron                   | Acanthometron_sp.                   |
| 16     | Pico  | 51758       | 194              | 18   | Eukaryota | Hacrobia       | Cryptophyta             | Cryptophyceae             | Cryptomonadales            | Cryptomonadales_X                        | Teleaulax                       | Teleaulax_acuta                     |
| 90     | Pico  | 48449       | 194              | 19   | Eukaryota | Alveolata      | Dinoflagellata          | Dinophyceae               | Syndiniales                | Dino-Group-I                             | Dino-Group-I-Clade-1            | Dino-Group-I-Clade-1_X_sp.          |
| 99     | Pico  | 43871       | 103              | 20   | Eukaryota | Alveolata      | Dinoflagellata          | Dinophyceae               | Syndiniales                | Dino-Group-II                            | Dino-Group-II-Clade-10-and-11   | Dino-Group-II-Clade-10-and-11_X_sp. |
| 127    | Pico  | 41545       | 133              | 21   | Eukaryota | Stramenopiles  | Ochrophyta              | Bacillariophyta           | Bacillariophyta_X          | Polar-centric-Mediophyceae               | Unclassified                    | Unclassified                        |
| 107    | Pico  | 40999       | 227              | 22   | Eukaryota | Alveolata      | Dinoflagellata          | Dinophyceae               | Syndiniales                | Dino-Group-II                            | Dino-Group-II-Clade-20          | Dino-Group-II-Clade-20_X_sp.        |
| 117    | Pico  | 40438       | 101              | 23   | Eukaryota | Alveolata      | Dinoflagellata          | Dinophyceae               | Syndiniales                | Dino-Group-II                            | Dino-Group-II-Clade-7           | Dino-Group-II-Clade-7_X_sp.         |
| 148    | Pico  | 40165       | 284              | 24   | Eukaryota | Alveolata      | Dinoflagellata          | Dinophyceae               | Unclassified               | Unclassified                             | Unclassified                    | Unclassified                        |
| 136    | Pico  | 40094       | 33               | 25   | Eukaryota | Alveolata      | Dinoflagellata          | Dinophyceae               | Syndiniales                | Dino-Group-II                            | Dino-Group-II-Clade-10-and-11   | Dino-Group-II-Clade-10-and-11_X_sp. |
| 18     | Pico  | 38449       | 271              | 26   | Eukaryota | Alveolata      | Dinoflagellata          | Dinophyceae               | Gymnodinales               | Unclassified                             | Unclassified                    | Unclassified                        |
| 100    | Pico  | 38293       | 282              | 27   | Eukaryota | Stramenopiles  | Sagenista               | MAST-7                    | MAST-7B                    | MAST-7B_XX                               | MAST-7B_XX_sp.                  | MAST-7B_XX_sp.                      |
| 147    | Pico  | 37870       | 249              | 28   | Eukaryota | Alveolata      | Ciliophora              | Spirotrichea              | Strombidida                | Strombididae_M                           | Unclassified                    | Unclassified                        |
| 94     | Pico  | 37457       | 167              | 29   | Eukaryota | Alveolata      | Ciliophora              | Spirotrichea              | Strombidida                | Tontoniidae_A                            | Laboea                          | Unclassified                        |
| 59     | Pico  | 37031       | 264              | 30   | Eukaryota | Hacrobia       | Cryptophyta             | Cryptophyceae             | Cryptomonadales            | Cryptomonadales_X                        | Unclassified                    | Unclassified                        |
| 106    | Pico  | 35748       | 255              | 31   | Eukaryota | Alveolata      | Ciliophora              | Spirotrichea              | Strombidida                | Strombidida_G_XX                         | Strombidida_G_XX_sp.            | Strombidida_G_XX_sp.                |
| 98     | Pico  | 34796       | 154              | 32   | Eukaryota | Hacrobia       | Picozoa                 | Picozoa_X                 | Picozoa_XX                 | Picozoa_XXX                              | Unclassified                    | Unclassified                        |
| 48     | Pico  | 34594       | 278              | 33   | Eukaryota | Alveolata      | Dinoflagellata          | Dinophyceae               | Unclassified               | Unclassified                             | Unclassified                    | Unclassified                        |
| 55     | Pico  | 34525       | 243              | 34   | Eukaryota | Archaeplastida | Chlorophyta             | Mamiellophyceae           | Mamielliales               | Bathycocaceae                            | Ostreococcus                    | Ostreococcus_tauri                  |
| 8      | Pico  | 34483       | 2                |      |           |                |                         |                           |                            |                                          |                                 |                                     |

**Supplementary Table 3: Name, ranks, number of OTUs, and number of OTUs with successful trait annotation along the subsets of 5000 OTUs of the rank abundance curves of micro, nano, and picoplankton.**

| Size Fraction | Fraction of the rank abundance curve |                      |           | # of OTUs with traits | # of non-annotated OTUs | % annotated |
|---------------|--------------------------------------|----------------------|-----------|-----------------------|-------------------------|-------------|
|               | Subset                               | rank abundance curve | # of OTUs |                       |                         |             |
| Micro         | Abundant                             | 0-38                 | 38        | 17                    | 21                      | 44,74       |
| Micro         | 2500                                 | 0-5000               | 5000      | 2333                  | 2667                    | 46,66       |
| Micro         | 5000                                 | 2500-7500            | 5000      | 2246                  | 2754                    | 44,92       |
| Micro         | 7500                                 | 5000-10000           | 5000      | 2172                  | 2828                    | 43,44       |
| Micro         | 10000                                | 7500-12500           | 5000      | 2139                  | 2861                    | 42,78       |
| Micro         | 12500                                | 10000-15000          | 5000      | 2153                  | 2847                    | 43,06       |
| Micro         | 15000                                | 12500-17500          | 5000      | 2122                  | 2878                    | 42,44       |
| Micro         | 17500                                | 15000-20000          | 5000      | 2210                  | 2790                    | 44,20       |
| Micro         | 20000                                | 17500-22500          | 5000      | 2230                  | 2770                    | 44,60       |
| Micro         | 22500                                | 20000-25000          | 5000      | 2095                  | 2905                    | 41,90       |
| Micro         | 25000                                | 22500-27500          | 5000      | 2124                  | 2876                    | 42,48       |
| Micro         | 27500                                | 25000-30000          | 5000      | 2174                  | 2826                    | 43,48       |
| Micro         | 30000                                | 27500-32500          | 5000      | 2158                  | 2842                    | 43,16       |
| Micro         | 32500                                | 30000-35000          | 5000      | 2113                  | 2887                    | 42,26       |
| Micro         | 35000                                | 32500-37500          | 5000      | 2204                  | 2796                    | 44,08       |
| Micro         | 37500                                | 35000-40000          | 5000      | 2242                  | 2758                    | 44,84       |
| Micro         | 40000                                | 37500-42500          | 5000      | 2189                  | 2811                    | 43,78       |
| Micro         | 42500                                | 40000-44 813         | 4813      | 2098                  | 2715                    | 43,59       |
| Micro         | 44813                                | 42 313-44 813        | 2500      | 1080                  | 1420                    | 43,20       |
| Nano          | Abundant                             | 0-32                 | 32        | 12                    | 20                      | 37,50       |
| Nano          | 2500                                 | 0-5000               | 5000      | 2317                  | 2683                    | 46,34       |
| Nano          | 5000                                 | 2500-7500            | 5000      | 2169                  | 2831                    | 43,38       |
| Nano          | 7500                                 | 5000-10000           | 5000      | 2076                  | 2924                    | 41,52       |
| Nano          | 10000                                | 7500-12500           | 5000      | 1995                  | 3005                    | 39,90       |
| Nano          | 12500                                | 10000-15000          | 5000      | 2031                  | 2969                    | 40,62       |
| Nano          | 15000                                | 12500-17500          | 5000      | 2054                  | 2946                    | 41,08       |
| Nano          | 17500                                | 15000-20000          | 5000      | 2013                  | 2987                    | 40,26       |
| Nano          | 20000                                | 17500-22500          | 5000      | 2021                  | 2979                    | 40,42       |
| Nano          | 22500                                | 20000-25000          | 5000      | 2110                  | 2890                    | 42,20       |
| Nano          | 25000                                | 22500-27500          | 5000      | 2139                  | 2861                    | 42,78       |
| Nano          | 27500                                | 25000-30000          | 5000      | 2160                  | 2840                    | 43,20       |
| Nano          | 30000                                | 27500-32500          | 5000      | 2103                  | 2897                    | 42,06       |
| Nano          | 32500                                | 30000-35000          | 5000      | 1980                  | 3020                    | 39,60       |
| Nano          | 35000                                | 32500-37500          | 5000      | 1964                  | 3036                    | 39,28       |
| Nano          | 37500                                | 35000-40000          | 5000      | 2175                  | 2825                    | 43,50       |
| Nano          | 40000                                | 37500-42500          | 5000      | 2233                  | 2767                    | 44,66       |
| Nano          | 42500                                | 40000-45000          | 5000      | 2042                  | 2958                    | 40,84       |
| Nano          | 45000                                | 42500-47500          | 5000      | 2088                  | 2912                    | 41,76       |
| Nano          | 47500                                | 45000-50000          | 5000      | 2282                  | 2718                    | 45,64       |
| Nano          | 50000                                | 47500-52500          | 5000      | 2451                  | 2549                    | 49,02       |
| Nano          | 52500                                | 50000-55000          | 5000      | 2372                  | 2628                    | 47,44       |
| Nano          | 55000                                | 52500-57500          | 5000      | 2236                  | 2764                    | 44,72       |
| Nano          | 57500                                | 55000-60000          | 5000      | 2264                  | 2736                    | 45,28       |
| Nano          | 60000                                | 57500-62500          | 5000      | 2270                  | 2730                    | 45,40       |
| Nano          | 62500                                | 60000-65000          | 5000      | 2469                  | 2531                    | 49,38       |
| Nano          | 65000                                | 62500-67500          | 5000      | 2584                  | 2416                    | 51,68       |
| Nano          | 67500                                | 65000-70000          | 5000      | 2517                  | 2483                    | 50,34       |
| Nano          | 70000                                | 67500-71380          | 3880      | 1965                  | 1915                    | 50,64       |
| Nano          | 71380                                | 68880-71380          | 2500      | 1264                  | 1236                    | 50,56       |
| Pico_AB       | Abundant                             | 0-40                 | 40        | 20                    | 20                      | 44,74       |
| Pico_2500     | 2500                                 | 0-5000               | 5000      | 2656                  | 2344                    | 46,66       |
| Pico_5000     | 5000                                 | 2500-7500            | 5000      | 2599                  | 2401                    | 44,92       |
| Pico_7500     | 7500                                 | 5000-10000           | 5000      | 2576                  | 2424                    | 43,44       |
| Pico_10000    | 10000                                | 7500-12500           | 5000      | 2549                  | 2451                    | 42,78       |
| Pico_12500    | 12500                                | 10000-15000          | 5000      | 2515                  | 2485                    | 43,06       |
| Pico_15000    | 15000                                | 12500-17500          | 5000      | 2493                  | 2507                    | 42,44       |
| Pico_17500    | 17500                                | 15000-20000          | 5000      | 2538                  | 2462                    | 44,20       |
| Pico_20000    | 20000                                | 17500-22500          | 5000      | 2633                  | 2367                    | 44,60       |
| Pico_22500    | 22500                                | 20000-25000          | 5000      | 2531                  | 2469                    | 41,90       |
| Pico_25000    | 25000                                | 22500-27500          | 5000      | 2475                  | 2525                    | 42,48       |
| Pico_27500    | 27500                                | 25000-30000          | 5000      | 2539                  | 2461                    | 43,48       |
| Pico_30000    | 30000                                | 27500-32500          | 5000      | 2418                  | 2582                    | 43,16       |
| Pico_32500    | 32500                                | 30000-35000          | 5000      | 2342                  | 2658                    | 42,26       |
| Pico_35000    | 35000                                | 32500-37500          | 5000      | 2417                  | 2583                    | 44,08       |
| Pico_37500    | 37500                                | 35000-40000          | 5000      | 2438                  | 2562                    | 44,84       |
| Pico_40000    | 40000                                | 37500-42500          | 5000      | 2400                  | 2600                    | 43,78       |
| Pico_42500    | 42500                                | 40000-45000          | 5000      | 2308                  | 2692                    | 43,59       |
| Pico_45000    | 45000                                | 42500-47500          | 5000      | 2221                  | 2779                    | 43,20       |
| Pico_47500    | 47500                                | 45000-50000          | 5000      | 2277                  | 2723                    | 43,20       |
| Pico_50000    | 50000                                | 47500-51568          | 4068      | 1929                  | 2139                    | 43,20       |
| Pico_52500    | 51568                                | 49068-51568          | 2500      | 1198                  | 1302                    | 43,20       |
